# Supplementary material for: Orthotic Device Use in Canine Patients: Owner Perception of Quality of Life for Owners and Patients
Source: Front Vet Sci. 2021 Nov 4;8:709364. doi: 10.3389/fvets.2021.709364 (PMC8600258; doi:10.3389/fvets.2021.709364)
Supplement: Supplementary file 1 [file Table_1.XLSX]

## Sheet: Sheet1
Response #	Q1 - Species	Q2 - Age at initial application of orthosis (years)	Q3 - Age at time of survey collection (years)	Q4 - Limb with orthotic eevice	Q5 - Type of orthotic device used	Q6 - Device used to full extent of veterinarian's recommendation?	Q7 - Average hours/day using device	Q8 - Weight (lbs) at initial orthosis application	Q9 - Weight (lbs) at time of survey collection	Q10 - Any complications?	Q11 - Complications resolved?	Q12 - Pet's level of tolerance while wearing device	Q13 - Pet's ability to ambulate while wearing device	Q14 - Rehabilitation or physical therapy used?	Q15 - Impact on pet's quality of life	Q16 - Impact on owner's quality of life	Q17 - Likeliness to recommend device to a friend?	Q18 - Total Cost of device	Q19 - Owner's age at time to pursue orthosis for pet	Q20 - Average annual income	Q21 - Additional Comments
1	Dog	11	N/A	Right forelimb	Wrist (carpal) brace for carpal hyperextension	Yes	10	100	90	Skin sores	Yes	Accepted device with no attempt to chew/lick/remove device	My pet was able to ambulate normally with device, including run	No	Very positive impact	The device has allowed my pet to return to more normal function, improving my quality of life	Extremely likely	1200	64	N/A
2	Dog	11	N/A	Left hindlimb	Ankle (tarsal) brace for an Achilles tendon injury	Yes	14	62	59	N/A	N/A	Accepted device but would chew/lick/remove device	My pet was able to walk further while wearing device than without the device	No	Very positive impact	The device has allowed my pet to return to more normal function, improving my quality of life	Extremely likely	1300	43	150000
3	Dog	8.5	Deceased; Age at Death: 9	Right Forelimb	Elbow Brace	Yes	12	100	N/A	Skin sores	Yes	Accepted device with no attempt to chew/lick/remove device	My pet was able to walk further while wearing device than without the device	Yes	Somewhat positive impact	My pet wearing the device has not changed my quality of life	Extremely likely	1500	60+	Over $250,000	Our much beloved Bernese Mt. Dog was a very active therapy dog who had elbow surgery due to OCD when he was one. He has arthritis in all joints, and ACL surgery on one of his back legs. We had a consult at TUFTS due to his increasing joint problems, and they suggested the orthotic. It was fitted locally, and initially he developed some sores, but we sent it back and they added some foam which did…
4	Dog	9	13	Right hindlimb, Left hindlimb	Ankle (tarsal) brace for other reason, Bilateral rear for overstretched gastrocnemius m. tendon	Yes	2	56	56	Skin sores, pain/sensitivity	No	Accepted device with no attempt to chew/lick/remove device	My pet was able to ambulate normally with device, including run	No	Very positive impact	The device has allowed my pet to return to more normal function, improving my quality of life	Extremely likely	3000	47	N/A	We tried other device companies initially, but Orthopets was the best. My dog is a white labradoodle with 2 wrecked gastrocnemius tendons (braces on both rear legs). She has had them for 4 years and she is doing great. She is 13 years old and happy and has a great life, thanks to the braces. The negative things such as raw spots and sore toes and hips are minor. The braces are awesome and we coul…
5	Dog	8	N/A	Left hindlimb	Ankle (tarsal) brace for an Achilles tendon injury	Yes	5	67	68	Skin sores	Yes	Accepted device with no attempt to chew/lick/remove device	My pet was able to walk further while wearing device than without the device	No	Somewhat negative impact	Getting the device to fit correctly has been a challenge for my quality of life	Neutral	3000	69	48000	Dog is just recovering from screw removed from ankle so limb very sore. She is on week 7 since surgery.
6	Dog	0.5	N/A	Right Hindlimb	Knee brace for CCL (ACL) injury	Yes	8	70	65	N/A	N/A	Accepted device with no attempt to chew/lick/remove device	My pet was able to ambulate normally with device, including run	No	Very positive impact	The device has allowed my pet to return to more normal function, improving my quality of life	Extremely Likely	1200	41	100000	Our dog loves his knee brace and looks forward to having it put on in the morning. His quality of life is much improved.
7	Dog	0.25	N/A	Left forelimb	Ankle (tarsal) brace for other reason	No - Took too long to get it to fit	3	145	145	Skin sores, Pain/sensitivity	Yes	Accepted device with no attempt to chew/lick/remove device	Cannot run, but he can walk	No	Somewhat negative impact	N/A	Likely	$2,000+	37	200000
8	Dog	0.33	N/A	Right Forelimb	Wrist (carpal) brace for other reasons	Yes	14	68	68	Skin sores, swelling, pain/sensitivity	Yes	Accepted device with no attempt to chew/lick/remove device	My pet was able to ambulate normally with device, including run	No	Very positive impact	The device has allowed my pet to return to more normal function, improving my quality of life, Getting the device to fit correctly has been a challenge for my quality of life	Extremely Likely	6000	60	$100,000+
9	Dog	0.42	7	Right hindlimb	Knee brace for CCL (ACL) injury, Ankle (tarsal) brace for other reason	Yes	1	69	65	Initial swelling due to leaving device on for too long	Yes	Accepted device with no attempt to chew/lick/remove device	My pet was able to walk further while wearing device than without the device	Yes	Very Positive Impact	The device has allowed my pet to return to more normal function, improving my quality of life	Extremely likely	1500	50	250000
10	Dog	0.08	7	Right hindlimb, Left Forelimb	Wrist (carpal) brace for carpal hyperextension	Yes	7	12	12	Skin sores, Pain/sensitiviy	No	Did not accept device	Pet walked less and actually becomes more sore after wearing them. I asked for help but recieved none. My vet and I have went with another company. Orthopets charged me 1564.84$ for something that was too heavy, and were not willing to help us.	Yes	Somewhat negative impact	The device wear schedule has had no impact on my quality of life	Extremely unlikely	1964.76	32	70000	It was a waste, Medvet has worked with me to find a better product/ company and we have. Thankfully so, the only thing that matters to me is my pets well being. I hope that no one else goes through what we had with orthopets. Most people cannot afford too.
11	Dog	0.08	12	Left forelimb	Wrist (carpal) brace for other reasons, Mild radio-carpal instability, due to partial failure (fracture) of the antebrachial-carpal joint arthrodesis.	Yes	16	66	66	N/A	N/A	Accepted device with no attempt to chew/lick/remove device	Can walk and run, but not as far as he did before injury, but better than he could without device	No	Very Positive Impact	The device has allowed my pet to return to more normal function, improving my quality of life	Likely	N/A	60	200000	We had pet insurance so that paid about 75% of the cost. I think cost was about $1,000 total for orthotic and fitting. But our dog had a plate put in first, then that removed, then his bone cracked.. finally the orthotic. So all that was maybe $6000 to 8000.. but we had insurance to help cover it. The orthotic has not got us back to long walks, but keeps our dog out walking, and no pain. So it ha…
12	Dog	6	6	Left hindlimb	Ankle (tarsal) brace for an Achilles tendon injury	Yes	22	80	80	Skin sores	No	Accepted device with no attempt to chew/lick/remove device	The device resulted in no change in my pets ability to ambulate	No	Somewhat positive impact	The device wear schedule has been detrimental to my quality of life	Neutral	$1,700 - $2,000	23	50000	My dog has been wearing the brace for about 2 months and developed a sore. I'm using antibacterial prescription wipes and it has improved, but hasn't completely healed yet.
13	Dog	15	Deceased; Age at Death: 15	Right hindlimb	Knee brace for CCL (ACL) injury	No, Poppy learned to hop like a rabbit to run instead of adjusting to the Orthotic	0.25	60	60	Food drag	No, Learned to hop and preferred that to the orthotic	Accepted device with no attempt to chew/lick/remove device	My pet was able to walk further while wearing device than without the device	No	No Impact	My pet wearing the device has not changed my quality of life	Unlikely	1500	57	160000	Poppy was a strong old dog but was already in decline when we opted for the orthotic over surgery.
14	Dog	0.5	11	Right hindlimb, Left hindlimb	Ankle (tarsal) brace for an Achilles tendon injury	N/A	0	108	90	N/A	Yes	Accepted device with no attempt to chew/lick/remove device	My pet was able to ambulate normally with device, including run	No	Very Positive Impact	The device has allowed my pet to return to more normal function, improving my quality of life	Extremely likely	5000	N/A	N/A	First diagnosed with partial R Achilles degradation Sep 2016. Subsequent total collapse of L Achilles Dec 2016. Initally fitted on L hindlimb Jan 2017, then on R hindlimb Feb 2017. Canine made great improvement, but will never be totally recovered due to severity of bi-lateral failures. Canine has impaired mobility, but no longer needs to wear either brace. Thus the "Hours" response of 0 (zero). …
15	Dog	11	12	Right hindlimb, Left hindlimb	Knee brace for CCL (ACL) injury, Ankle (tarsal) brace for other reason	Yes	2	65	65	N/A	N/A	Accepted device with no attempt to chew/lick/remove device	My pet was able to walk further while wearing device than without the device	Yes	Very positive impact	The device has allowed my pet to return to more normal function, improving my quality of life	Extremely likely	3500	52	110000	I would like highly recommend the Orthopets device to any pet owner as a fantastic alternative to surgery. My dog would not have done well with two knee surgeries at her age, and this has allowed her to continue to be able to do the things that she loves (like walking on her favourite trail and getting back in the water doing aqua therapy!)
16	Dog	7	Deceased; Age at Death: 8	Right forelimb	Ankle (tarsal) brace for other reason	Yes	10	85	N/A	N/A	N/A	Accepted device with no attempt to chew/lick/remove device	My pet was able to ambulate normally with device, including run	No	Very positive impact	The device has allowed my pet to return to more normal function, improving my quality of life	Extremely likely	5000	48	80000
17	Dog	0.08	9	Right forelimb, Left forelimb	Wrist (carpal) brace for other reasons	Yes	2	19	19	Skin sores, Swelling	Yes	Accepted device but would chew/lick/remove device	My pet was able to walk further while wearing device than without the device	No	Somewhat positive impact	My pet wearing the device has not changed my quality of life	Neutral	4000	42	N/A	I wish she would be able to run and walk more often with the device, the device just enables her to relief herself outdoors
18	Dog	2	3	Right forelimb	Wrist (carpal) brace for other reasons	Yes	2	45	40	Skin sores	Yes	Accepted device with no attempt to chew/lick/remove device	My pet was able to walk further while wearing device than without the device	No	Very positive impact	The device has allowed my pet to return to more normal function, improving my quality of life, The device wear schedule has had no impact on my quality of life	Extremely likely	1000	31	10000
19	Dog	10	10	Right hindlimb	Knee brace for CCL (ACL) injury	Yes	3	82	79	N/A	N/A	Accepted device with no attempt to chew/lick/remove device	My pet was able to walk further while wearing device than without the device	No	Somewhat positive impact	The device has allowed my pet to return to more normal function, improving my quality of life, The device wear schedule has had no impact on my quality of life	Likely	1100	40	N/A	My income has no point in how I use the device for my dog.
20	Dog	12	12	Right hindlimb	Knee brace for CCL (ACL) injury	No, The device was meant to be worn all day and only taken off at night. However, the brace causes irritation even after multiple attempts to modify the fit. So, the device is only worn when Byrdy is going for walks.	1	60	60	Skin sores	No, The device still causes sores/bleeding even after multiple attempts to modify the fit	Accepted device with no attempt to chew/lick/remove device	My pet was able to walk further while wearing device than without the device	Yes	Somewhat positive impact	Getting the device to fit correctly has been a challenge for my quality of life, The device wear schedule has had no impact on my quality of life	Likely	1000	35	150000
21	Dog	2	2	Right hindlimb, Left hindlimb	Knee brace for CCL (ACL) injury	No, Vet didn't recommend it.	6	75	60	Skin sores	Yes	Accepted device while being supervised	My pet was able to ambulate normally with device, including run	Yes	Very positive impact	The device has allowed my pet to return to more normal function, improving my quality of life	Extremely Likely	1100	34	250000
22	Dog	1	9	Left hindlimb	N/A	Yes	10	74	74	N/A	N/A	loved first device and looked forward to wearing it	My pet was able to ambulate normally with device, including run	Yes	Very positive impact	The device has allowed my pet to return to more normal function, improving my quality of life	Extremely likely	2800	57	350000	We are now working on a new device with orthopets to help benny from rolling out his upper leg and preventing his paw from hyperextending. the first brace was the best thing that ever happened to him and I think the new device will be the same Benny has had 14 orthopedic surgeries since he was one and is the happiest pup ever.
23	Dog	N/A	1.8	Right hindlimb	Ankle (tarsal) brace for an Achilles tendon injury	No, He was able to move off the brace early.	N/A	55	60	Skin sores	Yes	Accepted device but would chew/lick/remove device	My pet was able to ambulate normally with device, including run	No	Somewhat positive impact	The device wear schedule has been detrimental to my quality of life	Neutral	800	64	400000
24	Dog	N/A	7	Left hindlimb	Ankle (tarsal) brace for an Achilles tendon injury	Yes	N/A	78	82	Skin sores	Yes	Accepted device but would chew/lick/remove device	My pet was able to ambulate normally with device, including run	No	N/A	My pet wearing the device has not changed my quality of life	Extremely likely	2500	64	200000	He doesn't wear it anymore, He runs and plays like before. This is a wonderful device and really helped Opie
25	Dog	7	8	Right hindlimb	Ankle (tarsal) brace for an Achilles tendon injury	Yes	0	70	64	Skin sores	Yes	Accepted device but would chew/lick/remove device	My pet was able to ambulate normally with device, including run	No	Very positive impact	The device wear schedule has been detrimental to my quality of life	Extremely likely	2000	48	200000	Overall it hugely impacted my dogs health in a positive way. Only complaint would be the loud clomping of dog walking in house.
26	Dog	8	9	Right hindlimb	Knee brace for CCL (ACL) injury	Yes	4	53	53	Pain/sensitivity	No, After much conversation and alterations I was told that because of the confirmation of her ankle that the device would fit lower on her leg then normal.	he accepted the device without problems but if she wears it too long she will start to lick her foot.	My pet was able to walk further while wearing device than without the device	No	Somewhat positive impact	Getting the device to fit correctly has been a challenge for my quality of life, The device wear schedule has had no impact on my quality of life	Neutral	1000	36	50000	Since I paid a lot of money for a custom brace I was expecting it to fit my dog perfectly. I do feel like the brace is helping my dog on her walks (she can walk farther) but she really does not wear it outside of any activity because I know the brace starts to bother her if it is worn for too long. I feel like the brace was made properly and I am putting on the brace correctly but because her leg…
27	Dog	14	Deceased; Age at Death: 15	Left forelimb	Wrist (carpal) brace for carpal hyperextension	Yes	12	6	N/A	N/A	N/A	Accepted device with no attempt to chew/lick/remove device	My pet was able to walk further while wearing device than without the device	No	Very positive impact	The device has allowed my pet to return to more normal function, improving my quality of life	Extremely likely	1500	57	70000	My dog's orthosis greatly improved her ability to walk and enjoy her life again.
28	Dog	10	10	Right hindlimb	Knee and tarsal brace for gastrocnemius tendon and muscle injury.	Yes	3	60	60	N/A	N/A	Accepted device with no attempt to chew/lick/remove device	My pet was able to ambulate normally with device, including run	Yes	Somewhat positive impact	The device has allowed my pet to return to more normal function, improving my quality of life, The device wear schedule has had no impact on my quality of life	Extremely likely	1600	32	N/A
29	Dog	0.83	9	Left hindlimb	Ankle (tarsal) brace for an Achilles tendon injury	Yes	17	103	100	Skin sores	Yes	Accepted device with no attempt to chew/lick/remove device	Pet is able to walk and run while wearing the device but often requires assistance in getting up.	Yes	Somewhat negative impact	The device wear schedule has been detrimental to my quality of life	Likely	1500	61	120000	My pet is still wearing the device and undergoing physical therapy. He has only recently been allowed to start going for walks in the neighborhood and much shorter distances than he would like. Wearing the orthotic device has prevented tearing the tendons repaired by surgery but has reduced his mobility in that he can't get up without assistance about 50%of the time while wearing the device.
30	Dog	2	4	Left hindlimb	Ankle (tarsal) brace for an Achilles tendon injury	Yes	16	60	60	Skin sores, Swelling	Yes	Accepted device with no attempt to chew/lick/remove device	My pet was able to ambulate normally with device, including run	Yes	Very positive impact	The device has allowed my pet to return to more normal function, improving my quality of life	Extremely likely	1000	29	120000	I can not say enough good things about Orthopets. After my dogs Achilles tendon full laceration I was told by surgeons he would never be my off leash trail running buddy again. However, with Orthopets I was able to gradually rehabilitate him to 100% normal function. We now go on 10 mile off leash trail runs and he no longer wears the brace or has any lameness. I should say that I am a general pra…
31	Dog	7	7.5	Left hindlimb	Ankle (tarsal) brace for an Achilles tendon injury	Yes	24	72	72	Skin sores	Yes	Accepted device but would chew/lick/remove device	My pet was not able to ambulate while wearing the device	Yes	Somewhat positive impact	The device has allowed my pet to return to more normal function, improving my quality of life	Extremely likely	1100	49	120000	Good device and dog is completely healed after surgery and 5 months in device. She did have a lot of sores early on and we had to get some adjustments and padding added
32	Dog	7	9	Right hindlimb	Ankle (tarsal) brace for an Achilles tendon injury	Yes	23	80	82	Paw lost normal anatomical position.	It is improving after theplaw aspect of splint was removed by staff at CSU	Accepted device with no attempt to chew/lick/remove device	The device resulted in no change in my pets ability to ambulate	Yes	Somewhat positive impact	My pet wearing the device has not changed my quality of life	Likely	1400	58	80000
33	Dog	0.83	8	Right forelimb, Right hindimb	Ankle (tarsal) brace for other reason	Yes	1	50	50	N/A	N/A	Accepted device with no attempt to chew/lick/remove device	reduced capability due to extra weight/bulk	Yes	Somewhat positive impact	My pet wearing the device has not changed my quality of life	Neutral	2100	46	$100,000+
34	Dog	0.08	4	Right hindlimb	Ankle (tarsal) brace for an Achilles tendon injury	Yes	11	65	65	Skin sores	Yes	Accepted device with no attempt to chew/lick/remove device	My pet was able to walk further while wearing device than without the device	No	Very positive impact	My pet wearing the device has not changed my quality of life, The device wear schedule has had no impact on my quality of life	Extremely likely	1500	27	10000	The orthotic device was an ideal (however pricey) option after and MRI and surgery for a separated Achilles tendon. She was extremely active prior to the injury and the boot at least allows for walks during recovery. It is nice that the orthotic boot allows for adjustment (more bend) as the tendon and muscle reattach and heal more. Overall the boot is relatively easy to use and my dog has become …
35	Dog	1.5	5	Right hindlimb, left hindlimb	Brace boot for a large breed's achilles injury	Yes	12	135	135	Skin sores, hounds foot	Our dog still has a strange flat foot on hind right	Accepted device with no attempt to chew/lick/remove device	My pet was able to ambulate normally with device, including run	Yes	Somewhat positive impact	The device has allowed my pet to return to more normal function, improving my quality of life	Extremely unlikely	2400	34	100000	The orthopedic device needs stronger hardware. With BOTH boots we had to replace screws holding achilles strap from foot bed to leg brace. The screws falling off could have caused over extension to our dog's foot possibly causing this flat foot issue. The hardware was weak with NOT enough screw thread. Also an additional bike tread would have been useful both times we had to replace bottom bicycl…
36	Dog	N/A	5	Right hindlimb, left hindlimb	Ankle (tarsal) brace for an Achilles tendon injury	Yes	8	62	62	Skin sores	Yes	Accepted device with no attempt to chew/lick/remove device	The device resulted in no change in my pets ability to ambulate	Yes	Very positive impact	My pet wearing the device has not changed my quality of life	Extremely likely	6000	63	100000	These braces have been amazing, Iggy adapted to them with no problems. Iggy chases balls, swims, runs and act normal. From the get go she was happy I think they in fact released pain or discomfort for her. These have been a great way to fix her issues, we recommend them as alternative to surgery, these are a wonderful system.
37	Dog	7	9.5	Right forelimb	Wrist (carpal) brace for carpal hyperextension	Yes	N/A	75	75	Skin sores	Yes	Accepted device with no attempt to chew/lick/remove device	My pet was able to ambulate normally with device, including run	No	No impact	My pet wearing the device has not changed my quality of life, The device has allowed my pet to return to more normal function, improving my quality of life, The device wear schedule has had no impact on my quality of life	Extremely likely	2397	54	N/A	Service was great but Once we rec'd the device & all alterations were made -- we never heard from OrthoPets. Never followed up to see how things were going. Quite a disappointment. They got their money & that was that.
38	Dog	N/A	5	Right forelimb	Wrist (carpal) brace for carpal hyperextension	Yes	16	120	120	N/A	N/A	Accepted device with no attempt to chew/lick/remove device	My pet was able to ambulate normally with device, including run	No	Very positive impact	The device has allowed my pet to return to more normal function, improving my quality of life	Extremely likely	N/A	56	$250,000+	Without the device, the limb would have had to be amputated. Now he runs and plays. A large male Malamute, he's hard on everything (floors, yard, garden, us...) and the device has held up excellently. We decided on a second device so one will always be clean and can be sent in for refurbishment. Keeper asks for it every morning. Company has been wonderful to work with.
39	Dog	9	12	Right forelimb	Wrist (carpal) brace for carpal hyperextension	Yes	N/A	69	68	Skin sores	Yes	Accepted device with no attempt to chew/lick/remove device	My pet was able to ambulate normally with device, including run	Yes	Very positive impact	The device has allowed my pet to return to more normal function, improving my quality of life	Extremely likely	1500	76	45000
40	Dog	6	7	Left hindlimb	Ankle (tarsal) brace for an Achilles tendon injury	Yes	14	74	74	Skin sores	Yes	Accepted device with no attempt to chew/lick/remove device	My pet was able to ambulate normally with device, including run	No	Somewhat positive impact	The device has allowed my pet to return to more normal function, improving my quality of life	Likely	1400	47	N/A
41	Dog	8	10	Right forelimb	Wrist (carpal) brace for carpal hyperextension	No, Eko does not like it and fights me. He got hurt with it on and He just no longer wants me to put it on. I also took him for PT but because of the cost had to quit.	0	18	17	N/A	N/A	Did not accept device	N/A	No	No impact	N/A	Neutral	2300	69	65000
42	Dog	0.17	5	Left hindlimb	Ankle (tarsal) brace for an Achilles tendon injury	Yes	1	50	50	Skin sores, Swelling	Yes	Accepted device with no attempt to chew/lick/remove device	My pet was able to ambulate normally with device, including run	Yes	Very positive impact	The device has allowed my pet to return to more normal function, improving my quality of life	Extremely likely	3000	69	60000	Jane is a GSP and aloves to hunt birds and run and swim. The brace has allowed her do do what she loves and to take advantage of her countless hours of training.My vet said she has adapted better than any patient he has had.
43	Dog	12	Deceased; Age at Death: 14	Left forelimb	Wrist (carpal) brace for carpal hyperextension	No, Too much skin breakdown and dog hated it	0	52	44	Skin sores, Swelling, Pain/sensitivity	No	Did not accept device	The device resulted in no change in my pets ability to ambulate	No	Very negative impact	Getting the device to fit correctly has been a challenge for my quality of life	Unlikely	1500	45	75000
44	Dog	0.5	5	Left forelimb	Wrist (carpal) brace for carpal hyperextension	No, Device is used to allow dog to go for walks and hikes. Not necessary for when he's in house or yard.	1	83	83	N/A	N/A	Tries to hide leg initially when knows brace is going on. Does tripod for first couple minutes. Then he's fine.	I trust my dog is able to walk without lameness or injury with the brace.	Yes	Very positive impact	The device has allowed my pet to return to more normal function, improving my quality of life	Likely	1000	66	N/A
45	Dog	10	Deceased; Age at Death: 11	Left hindlimb	Knee brace for CCL (ACL) injury	Yes	6	48	50	N/A	N/A	Accepted device with no attempt to chew/lick/remove device	Moved normal. But understand she tore all on her only rear leg. Right rear was removed due to mast cell cancer	Yes	Very positive impact	The device has allowed my pet to return to more normal function, improving my quality of life	Extremely likely	1200	45	150000	This orthotic was a game changer for our tripod dog. She was unable to move around after tearing her ACL on her remaining rear leg. She wore the orthotic every day on average six hours for six months and now is not required to wear it.
46	Dog	0.5	8.5	Right forelimb	Wrist (carpal) brace for other reasons	Yes	16	63	62	Skin sores, Pain/sensitivity	Yes	Accepted device with no attempt to chew/lick/remove device	My pet was able to ambulate normally with device, including run	No	Very positive impact	The device has allowed my pet to return to more normal function, improving my quality of life	Extremely likely	5000	64	N/A
47	Dog	0.25	3	Right forelimb, Left forelimb	Wrist (carpal) brace for carpal hyperextension	Yes	20	37	37	Skin sores	No, Still working on a tolerance to the devices, sores are minor	Accepted device with no attempt to chew/lick/remove device	My pet was able to ambulate normally with device, including run	No	Very positive impact	The device has allowed my pet to return to more normal function, improving my quality of life	Extremely likely	2500	31	90000	My dog was very highly recommended for surgery for her carpel hypertension injuries. Unfortunately, the $13,000 estimate for those surgeries made that option prohibitive, so we perused orthotics. She has taken to the orthotics wonderfully and can play and exist much like a normal dog, all without the two surgeries and recoveries. The experience has not been perfect with some sores and the devices…
48	Dog	9	9	Right forelimb	lower leg brace (below the knee to the wrist)	Yes	24	140	140	N/A	N/A	Accepted device with no attempt to chew/lick/remove device	my pet has to wear the device to keep him from breaking his remaining bone.	No	Somewhat negative impact	The device wear schedule has had no impact on my quality of life	Likely	N/A	55	N/A
49	Dog	0.92	9	Left hindlimb	Knee brace for CCL (ACL) injury, Ankle (tarsal) brace for other reason	Yes	7	139	139	N/A	N/A	Accepted device with no attempt to chew/lick/remove device	My pet was able to walk further while wearing device than without the device	Yes	Very positive impact	My pet wearing the device has not changed my quality of life	Extremely likely	2400	48	35000	For my dog, I believe the Orthotic device was the best choice. I WOULD NOT choose to do a TPLO surgery on this dog. It is illogical to break a bone to fix a ligament. Plus, my dog's size and prior history with a right knee CCL tear precludes successful outcome. I am happy with the device. I will say that it does make it difficult for her to get up and move around with it, that is stressful for me…
50	Dog	4	8	Right Hindlimb	Ankle (tarsal) brace for an Achilles tendon injury	Yes	1	70	70	Skin sores, pain and cramping after playing ball sometimes	No	Accepted device with no attempt to chew/lick/remove device	My pet was able to ambulate normally with device, including run	Yes	Somewhat positive impact	My pet wearing the device has not changed my quality of life, Getting the device to fit correctly has been a challenge for my quality of life	Likely	1200	50	100000
51	Dog	0.25	8	Right hindlimb	Knee brace for CCL (ACL) injury	Yes	3	97	94	Skin sores	Yes	Accepted device but would chew/lick/remove device	My pet was not able to ambulate while wearing the device	Yes	No impact	My pet wearing the device has not changed my quality of life, The device wear schedule has had no impact on my quality of life	Unlikely	900	60	200000	After several weeks of device and rehab... vet recommended surgery. Use of device ended, followed my surgery and rehab. The dog is fully recovered and doing great.
52	Dog	6	9.5	Right hindlimb, Left hindlimb	Ankle (tarsal) brace for an Achilles tendon injury, Ankle (tarsal) brace for other reason	Yes	3	28	25	Skin sores	Yes	Accepted device with no attempt to chew/lick/remove device	My pet was able to ambulate normally with device, including run	Yes	Very positive impact	The device has allowed my pet to return to more normal function, improving my quality of life	Likely	2650	56	100000	Without the two hind braces we would have had to put Tilly down so our investment in the two leg braces has allowed Tilly to lead a relatively quiet and comfortable life even though she has never returned to her sport of agility.
53	Dog	0.33	10	Left forelimb	Wrist (carpal) brace for other reasons	Yes	1	76	74	Skin sores	Yes	Accepted device with no attempt to chew/lick/remove device	My pet was able to walk further while wearing device than without the device	Yes	Very positive impact	The device has allowed my pet to return to more normal function, improving my quality of life, Getting the device to fit correctly has been a challenge for my quality of life, The device wear schedule has had no impact on my quality of life	Extremely likely	2300	52	300000	Getting the proper fit for the device was a challenge. Our dog's (2) orthopedic doctors and myself could see that the original fit wasn't right. The leg was moving in the device and he was compensating by placing his left leg out to the side of his body. We went back and forth with videos, messages and pictures, for a few months. They kept telling us it fit properly. Only after PT got involved di…
54	Dog	3	4	Right forelimb	Wrist (carpal) brace for other reasons	Yes	8	105	100	N/A	N/A	Accepted device with no attempt to chew/lick/remove device	My pet was able to walk further while wearing device than without the device	Yes	Very positive impact	The device has allowed my pet to return to more normal function, improving my quality of life	Extremely likely	2200	N/A	N/A	orthotic used in conjunction with physical therapy, acupuncture, chiropractic, hyperbaric therapy, cold laser therapy, hydrotheraphy, TENS, Bemer therapy and Healing Touch
55	Dog	9	10.3	Right hindlimb	Knee brace for CCL (ACL) injury	No, The device did not work as intented. It does not stay on my dog's leg, slipping down from the intented positioning. In fact, the device comes off when my dog shakes.	0	18	18	N/A	N/A	Did not accept device	N/A	No	No impact	Getting the device to fit correctly has been a challenge for my quality of life	Unlikely	2000	65	250000
56	Dog	1	2	Right hindlimb	Ankle (tarsal) brace for an Achilles tendon injury	Yes	24	67	67	N/A	N/A	Accepted device while being supervised	My pet was able to walk further while wearing device than without the device	Yes	Very positive impact	The device has allowed my pet to return to more normal function, improving my quality of life	Extremely likely	1000	42	200000	Marvin's Orthopet brave was essential to his recovery from an Achilles Tendon rupture. I can't imagine the process without it. There no doubt he would not have the same function in his today if we did not have his Orthopets brace

## Sheet: Sheet2
Response #	8 - Weight - Intitial Application (lbs)	9 - Weight - Now (lbs)	8&9*** - Dog Size using Initial Weight	10 - Complications?	11 - Complications resolved?	13** - Pet Can move further	14 - Rehab or Physical Therapy Used?	15 - Pet's Quality of Life Impact	15** (+) or (-) Pet Quality of Life
1	100	90	XL	Skin sores	Yes	Yes	No	Very positive impact	Positive
2	62	59	L	N/A	N/A	Yes	No	Very positive impact	Positive
3	100	N/A	XL	Skin sores	Yes	Yes	Yes	Somewhat positive impact	Positive
4	56	56	L	Skin sores, pain/sensitivity	No	Yes	No	Very positive impact	Positive
5	67	68	L	Skin sores	Yes	Yes	No	Somewhat negative impact	Negative
6	70	65	L	N/A	N/A	Yes	No	Very positive impact	Positive
7	145	145	L	Skin sores, Pain/sensitivity	Yes	No	No	Somewhat negative impact	Negative
8	68	68	L	Skin sores, swelling, pain/sensitivity	Yes	Yes	No	Very positive impact	Positive
9	69	65	L	Initial swelling due to leaving device on for too long	Yes	Yes	Yes	Very Positive Impact	Positive
10	12	12	S	Skin sores, Pain/sensitiviy	No	No	Yes	Somewhat negative impact	Negative
11	66	66	L	N/A	N/A	Yes	No	Very Positive Impact	Positive
12	80	80	L	Skin sores	No	No	No	Somewhat positive impact	Positive
13	60	60	L	Food drag	No, Learned to hop and preferred that to the orthotic	Yes	No	No Impact	None
14	108	90	XL	N/A	Yes	Yes	No	Very Positive Impact	Positive
15	65	65	L	N/A	N/A	Yes	Yes	Very positive impact	Positive
16	85	N/A	L	N/A	N/A	Yes	No	Very positive impact	Positive
17	19	19	S	Skin sores, Swelling	Yes	Yes	No	Somewhat positive impact	Positive
18	45	40	M	Skin sores	Yes	Yes	No	Very positive impact	Positive
19	82	79	L	N/A	N/A	Yes	No	Somewhat positive impact	Positive
20	60	60	L	Skin sores	No, The device still causes sores/bleeding even after multiple attempts to modify the fit	Yes	Yes	Somewhat positive impact	Positive
21	75	60	L	Skin sores	Yes	Yes	Yes	Very positive impact	Positive
22	74	74	L	N/A	N/A	Yes	Yes	Very positive impact	Positive
23	55	60	M	Skin sores	Yes	Yes	No	Somewhat positive impact	Positive
24	78	82	L	Skin sores	Yes	Yes	No	N/A	N/A
25	70	64	L	Skin sores	Yes	Yes	No	Very positive impact	Positive
26	53	53	M	Pain/sensitivity	No, After much conversation and alterations I was told that because of the confirmation of her ankle that the device would fit lower on her leg then normal.	Yes	No	Somewhat positive impact	Positive
27	6	N/A	XS	N/A	N/A	Yes	No	Very positive impact	Positive
28	60	60	L	N/A	N/A	Yes	Yes	Somewhat positive impact	Positive
29	103	100	XL	Skin sores	Yes	Yes	Yes	Somewhat negative impact	Negative
30	60	60	L	Skin sores, Swelling	Yes	Yes	Yes	Very positive impact	Positive
31	72	72	L	Skin sores	Yes	No	Yes	Somewhat positive impact	Positive
32	80	82	L	Paw lost normal anatomical position.	It is improving after theplaw aspect of splint was removed by staff at CSU	No	Yes	Somewhat positive impact	Positive
33	50	50	M	N/A	N/A	No	Yes	Somewhat positive impact	Positive
34	65	65	L	Skin sores	Yes	Yes	No	Very positive impact	Positive
35	135	135	XL	Skin sores, hounds foot	Our dog still has a strange flat foot on hind right	Yes	Yes	Somewhat positive impact	Positive
36	62	62	L	Skin sores	Yes	No	Yes	Very positive impact	Positive
37	75	75	L	Skin sores	Yes	Yes	No	No impact	N/A
38	120	120	XL	N/A	N/A	Yes	No	Very positive impact	Positive
39	69	68	L	Skin sores	Yes	Yes	Yes	Very positive impact	Positive
40	74	74	L	Skin sores	Yes	Yes	No	Somewhat positive impact	Positive
41	18	17	S	N/A	N/A	N/A	No	No impact	N/A
42	50	50	M	Skin sores, Swelling	Yes	Yes	Yes	Very positive impact	Positive
43	52	44	M	Skin sores, Swelling, Pain/sensitivity	No	No	No	Very negative impact	Negative
44	83	83	L	N/A	N/A	N/A	Yes	Very positive impact	Positive
45	48	50	M	N/A	N/A	N/A	Yes	Very positive impact	Positive
46	63	62	L	Skin sores, Pain/sensitivity	Yes	Yes	No	Very positive impact	Positive
47	37	37	M	Skin sores	No, Still working on a tolerance to the devices, sores are minor	Yes	No	Very positive impact	Positive
48	140	140	XL	N/A	N/A	N/A	No	Somewhat negative impact	Negative
49	139	139	XL	N/A	N/A	Yes	Yes	Very positive impact	Positive
50	70	70	L	Skin sores, pain and cramping after playing ball sometimes	No	Yes	Yes	Somewhat positive impact	Positive
51	97	94	XL	Skin sores	Yes	No	Yes	No impact	N/A
52	28	25	S	Skin sores	Yes	Yes	Yes	Very positive impact	Positive
53	76	74	L	Skin sores	Yes	Yes	Yes	Very positive impact	Positive
54	105	100	XL	N/A	N/A	Yes	Yes	Very positive impact	Positive
55	18	18	S	N/A	N/A	N/A	No	No impact	N/A
56	67	67	L	N/A	N/A	Yes	Yes	Very positive impact	Positive
